# Supplementary material for: Contact with Mature Cows and Access to Pasture during Early Life Shape Dairy Heifer Behaviour at Integration into the Milking Herd
Source: MDPI journal article supplement (doi:10.3390/ani13132049), 2023-06-21
Supplement: s1 [file s1]

| Supplementary Table S1: Table outlining management procedures and data collection over the testing period of the integration trial |                                                                                                                                                                                                                                        |                                                                                                                                                                         |                                                                                                                                                                                   |
|------------------------------------------------------------------------------------------------------------------------------------|----------------------------------------------------------------------------------------------------------------------------------------------------------------------------------------------------------------------------------------|-------------------------------------------------------------------------------------------------------------------------------------------------------------------------|-----------------------------------------------------------------------------------------------------------------------------------------------------------------------------------|
| Day                                                                                                                                | Heifers                                                                                                                                                                                                                                | Cows                                                                                                                                                                    | Data Collected                                                                                                                                                                    |
| -4 <sup>1</sup>                                                                                                                    | Housed as one large replacement heifer herd                                                                                                                                                                                            | Housed in two large groups – early calvers and late calvers                                                                                                             | None                                                                                                                                                                              |
| -3                                                                                                                                 | Replicate (EC or LC <sup>2</sup> ) for weekend testing drafted from larger replacement herd. Heifers drafted individually into testing groups and sprayed to identify. Groups housed at pasture, no visual access to testing paddocks. | Housed in two large groups – early calvers and late calvers                                                                                                             | None                                                                                                                                                                              |
| -2                                                                                                                                 | Groups housed at pasture with no visual access to testing paddocks.                                                                                                                                                                    | Housed in two large groups – early calvers and late calvers                                                                                                             | None                                                                                                                                                                              |
| -1                                                                                                                                 | Groups housed at pasture with no visual access to testing paddocks.                                                                                                                                                                    | Replicate (EC or LC <sup>2</sup> ) brought to stockyards. Allocated cows sprayed to identify, drafted into 3 groups. Each group housed in section 1 of testing paddock. | None                                                                                                                                                                              |
| 1                                                                                                                                  | Heifers walked down laneway to testing paddock, walked through section 1 and into section 2, already populated with cows.                                                                                                              | Cows given access to section 2 of testing paddock                                                                                                                       | Heifers: collar & pedometer, continuous 1hr continuous observation of integration behaviour immediately after mixing<br>Cows: collars, continuous                                 |
| 2                                                                                                                                  | All animals given access to section 3 of testing paddock                                                                                                                                                                               |                                                                                                                                                                         | Heifers: collar & pedometer, continuous; 1 hour continuous observation of integration behaviour immediately after move to fresh pasture in section 3.<br>Cows: collars continuous |
| +1                                                                                                                                 | Heifers drafted from testing groups and returned to farm for entry into pre-calving lead feed program.                                                                                                                                 | Cows drafted from testing groups and returned to larger management groups.                                                                                              | None                                                                                                                                                                              |

<sup>1</sup>Day 1 denotes the first day of testing, and is described as 'Day 1' in the body of the paper. Management in the periods leading up to testing are denoted by the (-) symbol. Management in the days following the integration trial are denoted by the (+) symbol.

<sup>2</sup>EC denotes early calvers – animals due to calve in the first calving peak of the seasonal calving block. LC denotes late calvers – animals due to calve in the second calving peak of the seasonal calving block.

| Supplementary Table S2: Table of means detailing mean count of observed social behaviours over one 1hr period on Day 1, and one 1hr period on Day 2 <sup>1</sup> |             |         |              |           |            |             |
|------------------------------------------------------------------------------------------------------------------------------------------------------------------|-------------|---------|--------------|-----------|------------|-------------|
| Day                                                                                                                                                              | Behaviour   | Partner | Direction    | Treatment | Mean Count | 95% CI      |
| 1                                                                                                                                                                | Agonistic   | Heifer  | Deliver      | -S        | 1.30       | 0.64, 2.63  |
|                                                                                                                                                                  |             |         |              | +S        | 2.02       | 1.03, 3.97  |
|                                                                                                                                                                  |             |         |              | CC        | 0.52       | 0.22, 1.23  |
|                                                                                                                                                                  |             |         | Receive      | -S        | 1.25       | 0.62, 2.54  |
|                                                                                                                                                                  |             |         |              | +S        | 1.31       | 0.64, 2.67  |
|                                                                                                                                                                  |             |         |              | CC        | 1.38       | 0.68, 2.77  |
|                                                                                                                                                                  |             |         | Mutual/Total | -S        | 2.62       | 1.37, 5.00  |
|                                                                                                                                                                  |             |         |              | +S        | 3.40       | 1.80, 6.45  |
|                                                                                                                                                                  |             |         |              | CC        | 2.01       | 1.03, 3.90  |
|                                                                                                                                                                  |             | Cow     | Deliver      | -S        | 1.28       | 0.63, 2.60  |
|                                                                                                                                                                  |             |         |              | +S        | 0.70       | 0.31, 1.55  |
|                                                                                                                                                                  |             |         |              | CC        | 1.34       | 0.66, 2.72  |
|                                                                                                                                                                  |             |         | Receive      | -S        | 9.32       | 5.12, 16.96 |
|                                                                                                                                                                  |             |         |              | +S        | 7.09       | 3.84, 13.06 |
|                                                                                                                                                                  |             |         |              | CC        | 7.83       | 4.30, 14.26 |
|                                                                                                                                                                  |             |         | Mutual/Total | -S        | 12.39      | 6.84, 22.43 |
|                                                                                                                                                                  |             |         |              | +S        | 8.67       | 4.73, 15.88 |
|                                                                                                                                                                  |             |         |              | CC        | 9.80       | 5.41, 17.74 |
|                                                                                                                                                                  | Investigate | Heifer  | Deliver      | -S        | 0.82       | 0.38, 1.78  |
|                                                                                                                                                                  |             |         |              | +S        | 0.42       | 0.17, 1.03  |
|                                                                                                                                                                  |             |         |              | CC        | 0.54       | 0.23, 1.26  |
|                                                                                                                                                                  |             |         | Receive      | -S        | 0.39       | 0.16, 0.97  |
|                                                                                                                                                                  |             |         |              | +S        | 0.45       | 0.19, 1.10  |
|                                                                                                                                                                  |             |         |              | CC        | 0.58       | 0.25, 1.33  |
|                                                                                                                                                                  |             | Cow     | Deliver      | -S        | 4.69       | 2.52, 8.75  |
|                                                                                                                                                                  |             |         |              | +S        | 3.51       | 1.85, 6.66  |
|                                                                                                                                                                  |             |         |              | CC        | 3.68       | 1.96, 6.91  |
|                                                                                                                                                                  |             |         | Receive      | -S        | 2.39       | 1.24, 4.60  |
|                                                                                                                                                                  |             |         |              | +S        | 2.52       | 1.30, 4.89  |
|                                                                                                                                                                  |             |         |              | CC        | 2.20       | 1.14, 4.25  |
| 2                                                                                                                                                                | Agonistic   | Heifer  | Deliver      | -S        | 0.93       | 0.44, 1.98  |
|                                                                                                                                                                  |             |         |              | +S        | 1.67       | 0.83, 3.37  |
|                                                                                                                                                                  |             |         |              | CC        | 0.74       | 0.34, 1.63  |
|                                                                                                                                                                  |             |         | Receive      | -S        | 1.40       | 0.70, 2.82  |
|                                                                                                                                                                  |             |         |              | +S        | 1.14       | 0.54, 2.40  |
|                                                                                                                                                                  |             |         |              | CC        | 0.98       | 0.47, 2.06  |
|                                                                                                                                                                  |             |         | Mutual       | -S        | 2.44       | 1.27, 4.69  |
|                                                                                                                                                                  |             |         |              | +S        | 2.86       | 1.48, 5.53  |
|                                                                                                                                                                  |             |         |              | CC        | 1.96       | 1.01, 3.82  |
|                                                                                                                                                                  |             | Cow     | Deliver      | -S        | 0.55       | 0.24, 1.26  |
|                                                                                                                                                                  |             |         |              | +S        | 0.21       | 0.07, 0.66  |
|                                                                                                                                                                  |             |         |              | CC        | 0.23       | 0.08, 0.68  |
|                                                                                                                                                                  |             |         | Receive      | -S        | 5.13       | 2.78, 9.47  |
|                                                                                                                                                                  |             |         |              | +S        | 5.45       | 2.91, 10.19 |
|                                                                                                                                                                  |             |         |              | CC        | 6.45       | 3.53, 11.80 |
|                                                                                                                                                                  |             |         | Mutual       | -S        | 5.96       | 3.24, 10.94 |
|                                                                                                                                                                  |             |         |              | +S        | 5.73       | 3.07, 10.69 |
|                                                                                                                                                                  |             |         |              | CC        | 6.74       | 3.69, 12.31 |

<sup>1</sup> This table provides mean values for social behaviours observed during the hour after mixing on Day 1, and the hour after fresh pasture allocation on Day 2 of integration testing. Total agonistic behaviour encompasses agonistic behaviours received and delivered, as well as mutual aggression (head-to-head fights). Investigative behaviour could not be included for analysis on Day 2 due its low observance rate. CC= heifers reared commercially in sheds, without adult contact; +S= heifers reared at pasture with adult contact and -S= heifers reared at pasture without adult contact.

**Supplementary Table S3: Table detailing results of overall tests for effect of treatment on the nature of heifer interactions during testing<sup>1</sup>**

| Day | Behaviour   | Partner | Direction | <i>p</i>      | F    |
|-----|-------------|---------|-----------|---------------|------|
| 1   | Agonistic   | Heifer  | Deliver   | <b>0.007*</b> | 5.02 |
|     |             |         | Receive   | 0.965         | 0.04 |
|     |             |         | Mutual    | 0.233         | 1.46 |
|     |             | Cow     | Deliver   | 0.226         | 1.49 |
|     |             |         | Receive   | 0.555         | 0.59 |
|     |             |         | Mutual    | 0.343         | 1.07 |
|     | Investigate | Heifer  | Deliver   | 0.329         | 1.11 |
|     |             |         | Receive   | 0.729         | 0.32 |
|     |             | Cow     | Deliver   | 0.532         | 0.63 |
|     |             |         | Receive   | 0.913         | 0.09 |
| 2   | Agonistic   | Heifer  | Deliver   | 0.101         | 2.30 |
|     |             |         | Receive   | 0.636         | 0.45 |
|     |             |         | Mutual    | 0.498         | 0.70 |
|     |             | Cow     | Deliver   | 0.169         | 1.78 |
|     |             |         | Receive   | 0.662         | 0.41 |
|     |             |         | Mutual    | 0.812         | 0.21 |

<sup>1</sup>Data for each day correspond with the first hour after: Day 1: Heifers mixing with cows and, Day 2: Group allocation of fresh pasture. Observations were made by a single observer per heifer only. Significance is determined where  $p < 0.05$ , and is denoted in bold with an asterisk. Df for all tests = 2, 925.

**Supplementary Table S4: Table detailing pairwise comparisons of delivering agonistic behaviours to other heifers (Day 1)<sup>1</sup>**

| Measure         | (+S) / (-S) | CC / (-S)     | CC / (+S)     |
|-----------------|-------------|---------------|---------------|
| Ratio of means  | 1.6         | 0.40          | 0.26          |
| 95% CI          | 0.79, 3.1   | 0.17, 0.97    | 0.11, 0.60    |
| <i>p</i> -value | 0.203       | <b>0.041*</b> | <b>0.002*</b> |

<sup>1</sup>Data is provided only for pairwise tests undertaken on data sets where overall tests for effect of treatment yielded a significant result. Significance is determined where  $p < 0.05$ , and is denoted in bold with an asterisk. CC = heifers reared commercially in sheds, without adult contact; +S = heifers reared at pasture with adult contact and -S = heifers reared at pasture without adult contact.

| Supplementary Table S5: Table of means detailing mean proportion of time spent in behaviours recorded by RumiWatch pedometers <sup>1</sup> |           |           |                         |              |
|--------------------------------------------------------------------------------------------------------------------------------------------|-----------|-----------|-------------------------|--------------|
| Day                                                                                                                                        | Behaviour | Treatment | Mean proportion of time | 95% CI       |
| Day 1                                                                                                                                      | Lying     | -S        | 0.403                   | 0.323, 0.483 |
|                                                                                                                                            |           | +S        | 0.419                   | 0.340, 0.498 |
|                                                                                                                                            |           | CC        | 0.432                   | 0.338, 0.525 |
|                                                                                                                                            | Standing  | -S        | 0.568                   | 0.497, 0.638 |
|                                                                                                                                            |           | +S        | 0.548                   | 0.479, 0.616 |
|                                                                                                                                            |           | CC        | 0.542                   | 0.460, 0.625 |
|                                                                                                                                            | Walking   | -S        | 0.031                   | 0.017, 0.044 |
|                                                                                                                                            |           | +S        | 0.033                   | 0.020, 0.046 |
|                                                                                                                                            |           | CC        | 0.027                   | 0.013, 0.042 |
| Day 2                                                                                                                                      | Lying     | -S        | 0.308                   | 0.228, 0.389 |
|                                                                                                                                            |           | +S        | 0.339                   | 0.260, 0.418 |
|                                                                                                                                            |           | CC        | 0.300                   | 0.206, 0.393 |
|                                                                                                                                            | Standing  | -S        | 0.654                   | 0.584, 0.724 |
|                                                                                                                                            |           | +S        | 0.619                   | 0.550, 0.687 |
|                                                                                                                                            |           | CC        | 0.663                   | 0.580, 0.745 |
|                                                                                                                                            | Walking   | -S        | 0.039                   | 0.025, 0.052 |
|                                                                                                                                            |           | +S        | 0.042                   | 0.029, 0.056 |
|                                                                                                                                            |           | CC        | 0.038                   | 0.024, 0.053 |

<sup>1</sup> This table provides mean values for data collected by RumiWatch pedometers fitted to 36 experimental heifers for 24h after mixing on Day 1, and 12h after fresh pasture allocation on Day 2 of integration testing. CC= heifers reared commercially in sheds, without adult contact; +S= heifers reared at pasture with adult contact and -S= heifers reared at pasture without adult contact.

| Supplementary Table S6: Overall test for effect of treatment on behaviour captured by RumiWatch pedometers per observation day |             |          |             |          |
|--------------------------------------------------------------------------------------------------------------------------------|-------------|----------|-------------|----------|
| Behaviour                                                                                                                      | Day 1       |          | Day 2       |          |
|                                                                                                                                | F (df)      | <i>p</i> | F (df)      | <i>p</i> |
| Lying                                                                                                                          | 0.2 (2, 36) | 0.809    | 0.5 (2, 36) | 0.632    |
| Standing                                                                                                                       | 0.3 (2, 36) | 0.759    | 1.0 (2, 36) | 0.477    |
| Walking                                                                                                                        | 0.4 (2, 36) | 0.714    | 0.3 (2, 36) | 0.786    |

| Supplementary Table S7: Table detailing results of pairwise comparisons for significant behaviours (RumiWatch Pedometers) <sup>1</sup> |                 |             |                                            |               |          |
|----------------------------------------------------------------------------------------------------------------------------------------|-----------------|-------------|--------------------------------------------|---------------|----------|
| Day                                                                                                                                    | Behaviour       | Pairwise    | Difference of mean proportion <sup>2</sup> | 95% CI        | <i>p</i> |
| Day 1                                                                                                                                  | <b>Lying</b>    | (+S) - (-S) | 0.016                                      | -0.102, 0.134 | 0.688    |
|                                                                                                                                        |                 | CC - (-S)   | 0.029                                      | -0.093, 0.150 | 0.552    |
|                                                                                                                                        |                 | CC - (+S)   | 0.013                                      | -0.108, 0.133 | 0.789    |
|                                                                                                                                        | <b>Standing</b> | (+S) - (-S) | -0.020                                     | -0.118, 0.078 | 0.566    |
|                                                                                                                                        |                 | CC - (-S)   | -0.026                                     | -0.129, 0.077 | 0.539    |
|                                                                                                                                        |                 | CC - (+S)   | -0.006                                     | -0.107, 0.096 | 0.887    |
|                                                                                                                                        | <b>Walking</b>  | (+S) - (-S) | 0.003                                      | -0.017, 0.022 | 0.696    |
|                                                                                                                                        |                 | CC - (-S)   | -0.003                                     | -0.023, 0.016 | 0.652    |
|                                                                                                                                        |                 | CC - (+S)   | -0.006                                     | -0.025, 0.013 | 0.436    |
| Day 2                                                                                                                                  | <b>Lying</b>    | (+S) - (-S) | 0.031                                      | -0.087, 0.148 | 0.461    |
|                                                                                                                                        |                 | CC - (-S)   | -0.009                                     | -0.130, 0.113 | 0.855    |
|                                                                                                                                        |                 | CC - (+S)   | -0.039                                     | -0.160, 0.081 | 0.421    |
|                                                                                                                                        | <b>Standing</b> | (+S) - (-S) | -0.036                                     | -0.134, 0.063 | 0.333    |
|                                                                                                                                        |                 | CC - (-S)   | 0.009                                      | -0.094, 0.112 | 0.833    |
|                                                                                                                                        |                 | CC - (+S)   | 0.044                                      | -0.057, 0.146 | 0.305    |
|                                                                                                                                        | <b>Walking</b>  | (+S) - (-S) | 0.004                                      | -0.016, 0.023 | 0.575    |
|                                                                                                                                        |                 | CC - (-S)   | 0.000                                      | -0.020, 0.019 | 0.969    |
|                                                                                                                                        |                 | CC - (+S)   | -0.004                                     | -0.023, 0.015 | 0.585    |

<sup>1</sup>Data is provided only for pairwise tests undertaken on data sets where overall tests for effect of treatment yielded a significant result. Significance is determined where  $p < 0.05$ , and is denoted in bold with an asterisk. CC= heifers reared commercially in sheds, without adult contact; +S= heifers reared at pasture with adult contact and -S= heifers reared at pasture without adult contact. <sup>2</sup>Proportion of time.

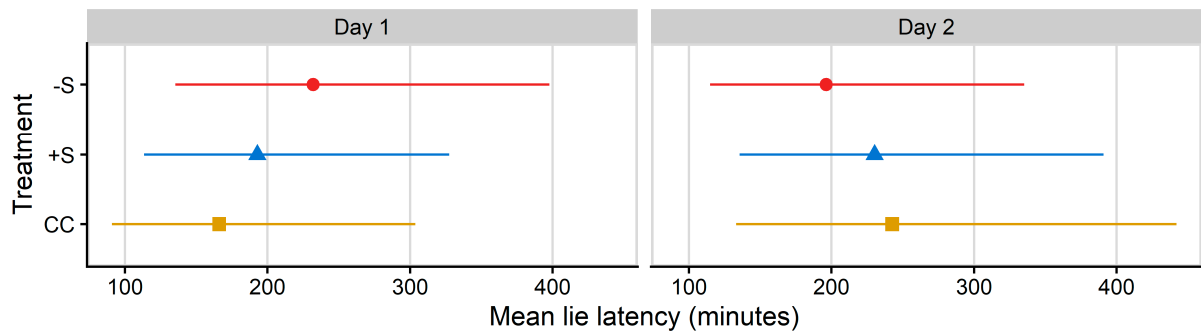

**Supplementary Figure S1: Figure illustrating mean latency to lie<sup>1</sup>**

<sup>1</sup> CC= heifers reared commercially in sheds, without adult contact; +S= heifers reared at pasture with adult contact and -S= heifers reared at pasture without adult contact.

| Supplementary Table S8: Table of means detailing mean latency to lie <sup>1</sup> |           |                         |          |
|-----------------------------------------------------------------------------------|-----------|-------------------------|----------|
| Day                                                                               | Treatment | Mean proportion of time | 95% CI   |
| 1                                                                                 | -S        | 232                     | 135, 398 |
|                                                                                   | +S        | 193                     | 113, 327 |
|                                                                                   | CC        | 166                     | 91, 304  |
| 2                                                                                 | -S        | 196                     | 115, 335 |
|                                                                                   | +S        | 230                     | 136, 391 |
|                                                                                   | CC        | 243                     | 133, 442 |

<sup>1</sup> Data in this table was collected by RumiWatch pedometers fitted to 36 experimental heifers for 24h after mixing on Day 1, and 12h after fresh pasture allocation on Day 2 of integration testing. CC= heifers reared commercially in sheds, without adult contact; +S= heifers reared at pasture with adult contact and -S= heifers reared at pasture without adult contact.

| Supplementary Table S9: Table detailing results of pairwise comparisons for latency to lie <sup>1</sup> |             |                             |            |          |
|---------------------------------------------------------------------------------------------------------|-------------|-----------------------------|------------|----------|
| Day                                                                                                     | Pairwise    | Ratio of Means <sup>2</sup> | 95% CI     | <i>p</i> |
| 1                                                                                                       | (+S) / (-S) | 0.83                        | 0.56, 1.24 | 0.358    |
|                                                                                                         | CC / (-S)   | 0.72                        | 0.45, 1.14 | 0.154    |
|                                                                                                         | CC / (+S)   | 0.86                        | 0.53, 1.40 | 0.542    |
| 2                                                                                                       | (+S) / (-S) | 1.17                        | 0.79, 1.74 | 0.423    |
|                                                                                                         | CC / (-S)   | 1.24                        | 0.78, 1.96 | 0.357    |
|                                                                                                         | CC / (+S)   | 1.05                        | 0.65, 1.71 | 0.828    |

<sup>1</sup>Data is provided for pairwise tests undertaken on all latency to lie data. Data in this table was collected by RumiWatch pedometers fitted to 36 experimental heifers for 24h after mixing on Day 1, and 12h after fresh pasture allocation on Day 2 of integration testing. Significance is determined where  $p < 0.05$ , and is denoted in bold with an asterisk. CC= heifers reared commercially in sheds, without adult contact; +S= heifers reared at pasture with adult contact and -S= heifers reared at pasture without adult contact.

<sup>2</sup>Proportion of time

| <b>Supplementary Table S10: Table of Means – MooMonitor collars<sup>1</sup></b> |                   |                  |                                |               |
|---------------------------------------------------------------------------------|-------------------|------------------|--------------------------------|---------------|
| <b>Day</b>                                                                      | <b>Behaviour</b>  | <b>Treatment</b> | <b>Mean proportion of time</b> | <b>95% CI</b> |
| <b>Day 1</b>                                                                    | <b>Rumination</b> | -S               | 0.379                          | 0.342, 0.416  |
|                                                                                 |                   | +S               | 0.371                          | 0.332, 0.409  |
|                                                                                 |                   | CC               | 0.377                          | 0.342, 0.411  |
|                                                                                 |                   | Cow              | 0.370                          | 0.349, 0.391  |
|                                                                                 | <b>Resting</b>    | -S               | 0.184                          | 0.139, 0.229  |
|                                                                                 |                   | +S               | 0.205                          | 0.159, 0.250  |
|                                                                                 |                   | CC               | 0.201                          | 0.156, 0.245  |
|                                                                                 |                   | Cow              | 0.222                          | 0.178, 0.266  |
|                                                                                 | <b>Feeding</b>    | -S               | 0.338                          | 0.292, 0.384  |
|                                                                                 |                   | +S               | 0.342                          | 0.294, 0.389  |
|                                                                                 |                   | CC               | 0.362                          | 0.319, 0.404  |
|                                                                                 |                   | Cow              | 0.348                          | 0.325, 0.370  |
| <b>Day 2</b>                                                                    | <b>Rumination</b> | -S               | 0.212                          | 0.175, 0.249  |
|                                                                                 |                   | +S               | 0.258                          | 0.220, 0.296  |
|                                                                                 |                   | CC               | 0.228                          | 0.194, 0.263  |
|                                                                                 |                   | Cow              | 0.297                          | 0.276, 0.318  |
|                                                                                 | <b>Resting</b>    | -S               | 0.145                          | 0.100, 0.190  |
|                                                                                 |                   | +S               | 0.188                          | 0.142, 0.233  |
|                                                                                 |                   | CC               | 0.140                          | 0.096, 0.184  |
|                                                                                 |                   | Cow              | 0.159                          | 0.115, 0.203  |
|                                                                                 | <b>Feeding</b>    | -S               | 0.514                          | 0.468, 0.560  |
|                                                                                 |                   | +S               | 0.466                          | 0.418, 0.513  |
|                                                                                 |                   | CC               | 0.536                          | 0.494, 0.578  |
|                                                                                 |                   | Cow              | 0.464                          | 0.442, 0.587  |

<sup>1</sup> This table provides mean values for data collected by MooMonitor+ collars fitted to all experimental animals, for 24h after mixing on Day 1, and 12h after fresh pasture allocation on Day 2 of integration testing. CC= heifers reared commercially in sheds, without adult contact; +S= heifers reared at pasture with adult contact and -S= heifers reared at pasture without adult contact, Cow = resident cows taken from the larger milking herd, housed with heifers at a ratio of 2 cows:1 heifer.

| Supplementary Table S11: Pairwise comparisons (MooMonitor Collars) <sup>1</sup> |            |             |                                  |                |                    |
|---------------------------------------------------------------------------------|------------|-------------|----------------------------------|----------------|--------------------|
| Day                                                                             | Behaviour  | Pairwise    | Difference of means <sup>2</sup> | 95% CI         | <i>p</i>           |
| Day 1                                                                           | Rumination | (+S) - (-S) | -0.008                           | -0.059, 0.043  | 0.754              |
|                                                                                 |            | CC - (-S)   | -0.002                           | -0.050, 0.046  | 0.936              |
|                                                                                 |            | CC - (+S)   | 0.006                            | -0.043, 0.055  | 0.805              |
|                                                                                 |            | Cow - (-S)  | -0.009                           | -0.047, 0.029  | 0.649              |
|                                                                                 |            | Cow - (+S)  | -0.001                           | -0.040, 0.039  | 0.971              |
|                                                                                 |            | Cow - CC    | -0.007                           | -0.043, 0.029  | 0.704              |
|                                                                                 | Resting    | (+S) - (-S) | 0.021                            | -0.022, 0.064  | 0.339              |
|                                                                                 |            | CC - (-S)   | 0.017                            | -0.024, 0.057  | 0.413              |
|                                                                                 |            | CC - (+S)   | -0.004                           | -0.045, 0.037  | 0.848              |
|                                                                                 |            | Cow - (-S)  | 0.038                            | 0.006, 0.070   | <b>0.020**</b>     |
|                                                                                 |            | Cow - (+S)  | 0.017                            | -0.016, 0.051  | 0.307              |
|                                                                                 |            | Cow - CC    | 0.021                            | -0.009, 0.051  | 0.164              |
|                                                                                 | Feeding    | (+S) - (-S) | 0.004                            | 0.061, 0.069   | 0.902              |
|                                                                                 |            | CC - (-S)   | 0.024                            | -0.037, 0.085  | 0.439              |
|                                                                                 |            | CC - (+S)   | 0.020                            | -0.042, 0.082  | 0.529              |
|                                                                                 |            | Cow - (-S)  | 0.010                            | -0.039, 0.058  | 0.688              |
|                                                                                 |            | Cow - (+S)  | 0.006                            | -0.044, 0.056  | 0.818              |
|                                                                                 |            | Cow - CC    | -0.014                           | -0.060, 0.031  | 0.541              |
| Day 2                                                                           | Rumination | (+S) - (-S) | 0.047                            | -0.004, 0.097  | 0.072*             |
|                                                                                 |            | CC - (-S)   | 0.017                            | -0.031, 0.064  | 0.496              |
|                                                                                 |            | CC - (+S)   | -0.030                           | -0.079, 0.019  | 0.227              |
|                                                                                 |            | Cow - (-S)  | 0.085                            | 0.047, 0.123   | <b>&lt;0.001**</b> |
|                                                                                 |            | Cow - (+S)  | 0.038                            | -0.001, 0.078  | 0.056*             |
|                                                                                 |            | Cow - CC    | 0.069                            | 0.033, 0.10    | <b>&lt;0.001**</b> |
|                                                                                 | Resting    | (+S) - (-S) | 0.043                            | 0.000, 0.086   | <b>0.050**</b>     |
|                                                                                 |            | CC - (-S)   | -0.005                           | -0.046, 0.035  | 0.797              |
|                                                                                 |            | CC - (+S)   | -0.048                           | -0.089, -0.007 | <b>0.023**</b>     |
|                                                                                 |            | Cow - (-S)  | 0.014                            | -0.018, 0.046  | 0.402              |
|                                                                                 |            | Cow - (+S)  | -0.029                           | -0.062, 0.004  | 0.086*             |
|                                                                                 |            | Cow - CC    | 0.019                            | -0.011, 0.049  | 0.215              |
|                                                                                 | Feeding    | (+S) - (-S) | 0.048                            | -0.113, 0.017  | 0.144              |
|                                                                                 |            | CC - (-S)   | 0.022                            | -0.039, 0.083  | 0.473              |
|                                                                                 |            | CC - (+S)   | 0.070                            | 0.008, 0.133   | <b>0.027**</b>     |
|                                                                                 |            | Cow - (-S)  | -0.049                           | -0.098, -0.001 | <b>0.046**</b>     |
|                                                                                 |            | Cow - (+S)  | -0.001                           | -0.051, 0.049  | 0.961              |
|                                                                                 |            | Cow - CC    | -0.072                           | -0.117, -0.026 | <b>0.002**</b>     |

<sup>1</sup>Data is provided for pairwise tests undertaken on all data collected by MooMonitor+ collars fitted to all experimental animals, for 24h after mixing on Day 1, and 12h after fresh pasture allocation on Day 2 of integration testing. Significance is determined where  $p < 0.05$ , and is denoted in bold with an asterisk. CC= heifers reared commercially in sheds, without adult contact; +S= heifers reared at pasture with adult contact and -S= heifers reared at pasture without adult contact, Cow = resident cows taken from the larger milking herd, housed with heifers at a ratio of 2 cows:1 heifer.

<sup>2</sup>Proportion of time



| Supplementary Table S12: table detailing pairwise comparisons of synchrony data <sup>1</sup> |             |                |                |                |
|----------------------------------------------------------------------------------------------|-------------|----------------|----------------|----------------|
| Day                                                                                          | Pairwise    | Ratio of Means | 95% CI         | <i>p</i>       |
| 2                                                                                            | (+S) - (-S) | 0.000          | -0.061, 0.060  | 0.990          |
|                                                                                              | CC - (-S)   | -0.016         | -0.073, 0.041  | 0.579          |
|                                                                                              | CC - (+S)   | -0.016         | -0.074, 0.042  | 0.596          |
|                                                                                              | Cow - (-S)  | -0.056         | -0.101, -0.011 | <b>0.016**</b> |
|                                                                                              | Cow - (+S)  | -0.055         | -0.102, -0.009 | <b>0.020**</b> |
|                                                                                              | Cow - CC    | -0.040         | -0.082, 0.002  | <i>0.064*</i>  |

<sup>1</sup> Data is provided only for pairwise tests undertaken on data sets where overall tests for effect of treatment yielded a significant result. Synchrony was calculated according to a binary (performing/not performing a behaviour) for each 15min time interval collected by MooMonitor+ collars according to Ruckstuhl's index (i.e. a synchrony index calculated from the proportion of total time intervals spent performing the same behaviour as the group mean behaviour over the period of data collection). Data correspond to the 24h after first mixing with a herd of mature cows (Day 1) and 12h after the mixed group was moved to a fresh allocation of pasture (Day 2). CC= heifers reared commercially in sheds, without adult contact; +S= heifers reared at pasture with adult contact and -S= heifers reared at pasture without adult contact; Cow = resident cows taken from the larger milking herd, housed with heifers at a ratio of 2 cows:1 heifer.

**Supplementary Table S13.** Overall test for effect of treatment on synchrony behaviour per observation day<sup>a</sup>.

| Behaviour  | Day 1        |          | Day 2        |               |
|------------|--------------|----------|--------------|---------------|
|            | F (df)       | <i>p</i> | F (df)       | <i>p</i>      |
| Ruminating | 0.3 (3, 202) | 0.819    | 3.9 (3, 202) | <b>0.010*</b> |
| Resting    | 1.9 (3, 201) | 0.130    | 1.9 (3, 201) | 0.128         |
| Feeding    | 0.6 (3, 201) | 0.629    | 1.4 (3, 201) | 0.248         |

<sup>a</sup> Data correspond to the 24h after first mixing with a herd of mature cows (Day 1) and 12h after the mixed group was moved to a fresh allocation of pasture (Day 2). \*signifies a significant difference as determined by statistical analysis (i.e.  $p < 0.05$ ).
